# Supplementary material
Source: publisher figshare collection journal article supplement (https://acs.figshare.com/ndownloader/files/15368819)
Supplement: Supplementary file 1 [file 15368819]

# Supporting Information

## Tin Assisted Fully Exposed Platinum Clusters Stabilized on Defect-Rich Graphene for Dehydrogenation Reaction

*Jiayun Zhang,<sup>1, 2 #</sup> Yuchen Deng,<sup>3#</sup> Xiangbin Cai,<sup>4 #</sup> Yunlei Chen,<sup>5, 6 #</sup> Mi Peng,<sup>3</sup> Zhimin Jia,<sup>1, 2</sup> Zheng Jiang,<sup>7</sup> Pengju Ren,<sup>5, 6</sup> Siyu Yao,<sup>3</sup> Jinglin Xie,<sup>3</sup> Dequan Xiao,<sup>8</sup> Xiaodong Wen,<sup>5, 6</sup> Ning Wang,<sup>4\*</sup> Hongyang Liu,<sup>1, 2\*</sup> and Ding Ma,<sup>3\*</sup>*

<sup>1</sup> Shenyang National Laboratory for Materials Science, Institute of Metal Research, Chinese Academy of Sciences, Shenyang 110016, P. R. China.

<sup>2</sup> School of Materials Science and Engineering, University of Science and Technology of China, Hefei 230026, P. R. China.

<sup>3</sup> Beijing National Laboratory for Molecular Sciences, College of Chemistry and Molecular Engineering and College of Engineering, and BIC-ESAT, Peking University, Beijing 100871, P. R. China.

<sup>4</sup> Department of Physics and Center for Quantum Materials, Hong Kong University of Science and Technology, Clear Water Bay, Kowloon, HongKong SAR, P. R. China.

<sup>5</sup> State Key Laboratory of Coal Conversion, Institute Coal Chemistry, Chinese Academy of Sciences, Taiyuan 030001, P. R. China.

<sup>6</sup> University of Chinese Academy of Science, No. 19A Yuanquan Road, Beijing 100049, P. R. China.

<sup>7</sup> Shanghai Institute of Applied Physics, Chinese Academy of Sciences, Shanghai 201204, P. R. China.

<sup>8</sup> Center for Integrative Materials Discovery, Department of Chemistry and Chemical Engineering, University of New Haven, 300 Boston Post Road, West Haven, Connecticut 06516, United States.

\*Corresponding Author. Email: [liuhy@imr.ac.cn](mailto:liuhy@imr.ac.cn); [phwang@ust.hk](mailto:phwang@ust.hk); [dma@pku.edu.cn](mailto:dma@pku.edu.cn)

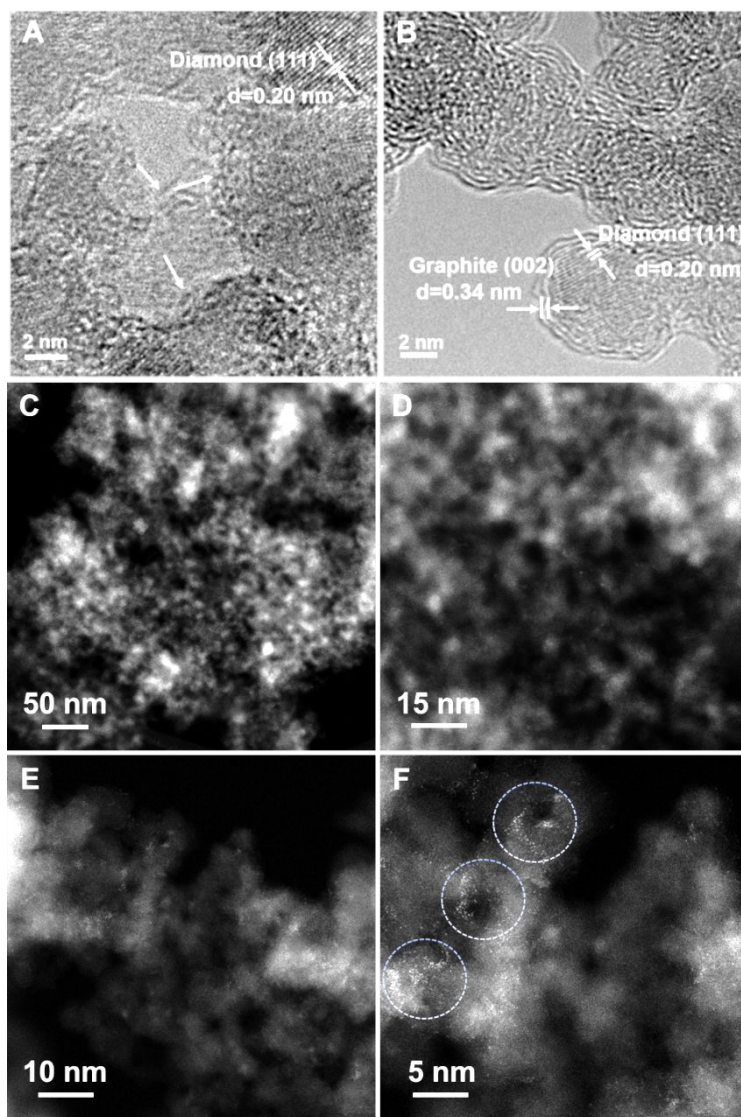

**fig. S1.** HRTEM images of **A)** the pristine ND and **B)** the ND@G. **C-F)** HAADF-STEM image of the Sn/ND@G catalyst with 0.5 wt% Sn.

The HRTEM images of the pristine ND and the ND@G hybrid support are displayed in **fig S1A-B**. The amorphous carbon can be seen on ND surface (as labeled by the white arrows). After calcination at 1100 °C, this amorphous carbon can be transferred into 2-3 layers of graphene nanoshell, while particular morphology with a size of 4-8 nm of the original ND phase is well maintained.<sup>1</sup> For the ND@G hybrid support, these defect-rich graphitic outer layer are curved and structurally reinforced by the ND core.<sup>2</sup> The HAADF-STEM image of the Sn/ND@G catalyst displayed in **fig S1C-F** indicated that the Sn can be homogenously dispersed on the ND@G support as marked in **fig S1F**.

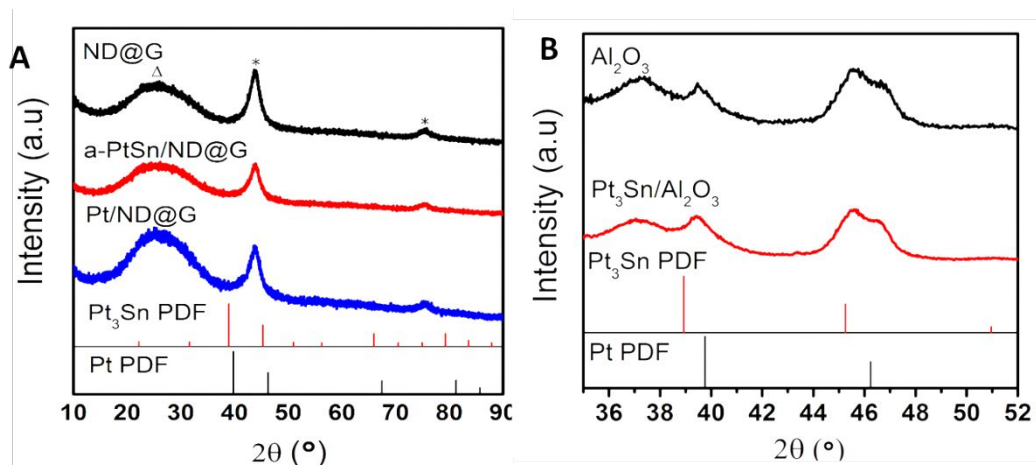

**fig. S2.** A ) XRD patterns of a-PtSn/ND@G, Pt/ND@G catalyst, and pure ND@G support (\*, ND;  $\Delta$ , graphene). B ) XRD patterns of Pt<sub>3</sub>Sn/ Al<sub>2</sub>O<sub>3</sub> catalyst, and pure Al<sub>2</sub>O<sub>3</sub> support.

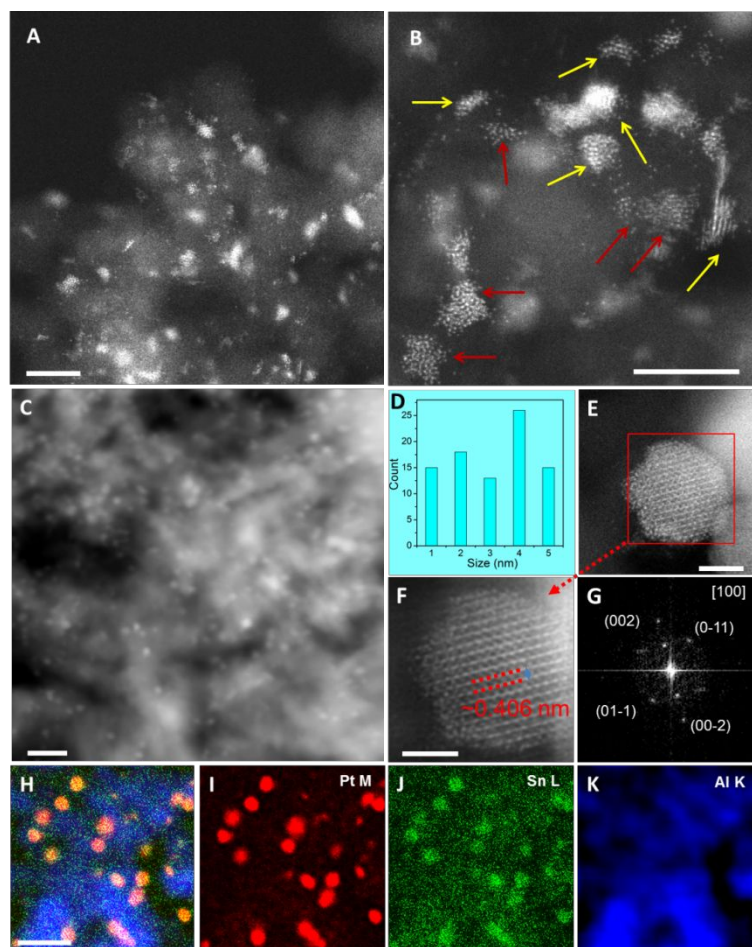

**fig. S3.** A) and B) HAADF-STEM images of the Pt/ND@G catalyst, scale bar, 5 nm, the red arrows and yellow arrows as marked in B) representing the atomically dispersed Pt clusters and Pt nanoparticles (with lattice structure) on ND@G support, respectively. C) HAADF-STEM images of the Pt<sub>3</sub>Sn/Al<sub>2</sub>O<sub>3</sub> catalyst, scale bar, 20 nm. D) The size distribution of the Pt<sub>3</sub>Sn/Al<sub>2</sub>O<sub>3</sub> catalyst and E-F) HAADF-STEM images of one randomly collected Pt<sub>3</sub>Sn alloy nanoparticle, scale bar, 2 nm, and G) the corresponding area-indexed image with Fourier transform of one Pt<sub>3</sub>Sn alloy nanoparticle. H-K) EDX mapping analysis of the Pt<sub>3</sub>Sn/Al<sub>2</sub>O<sub>3</sub> catalyst, scale bar, 20 nm.

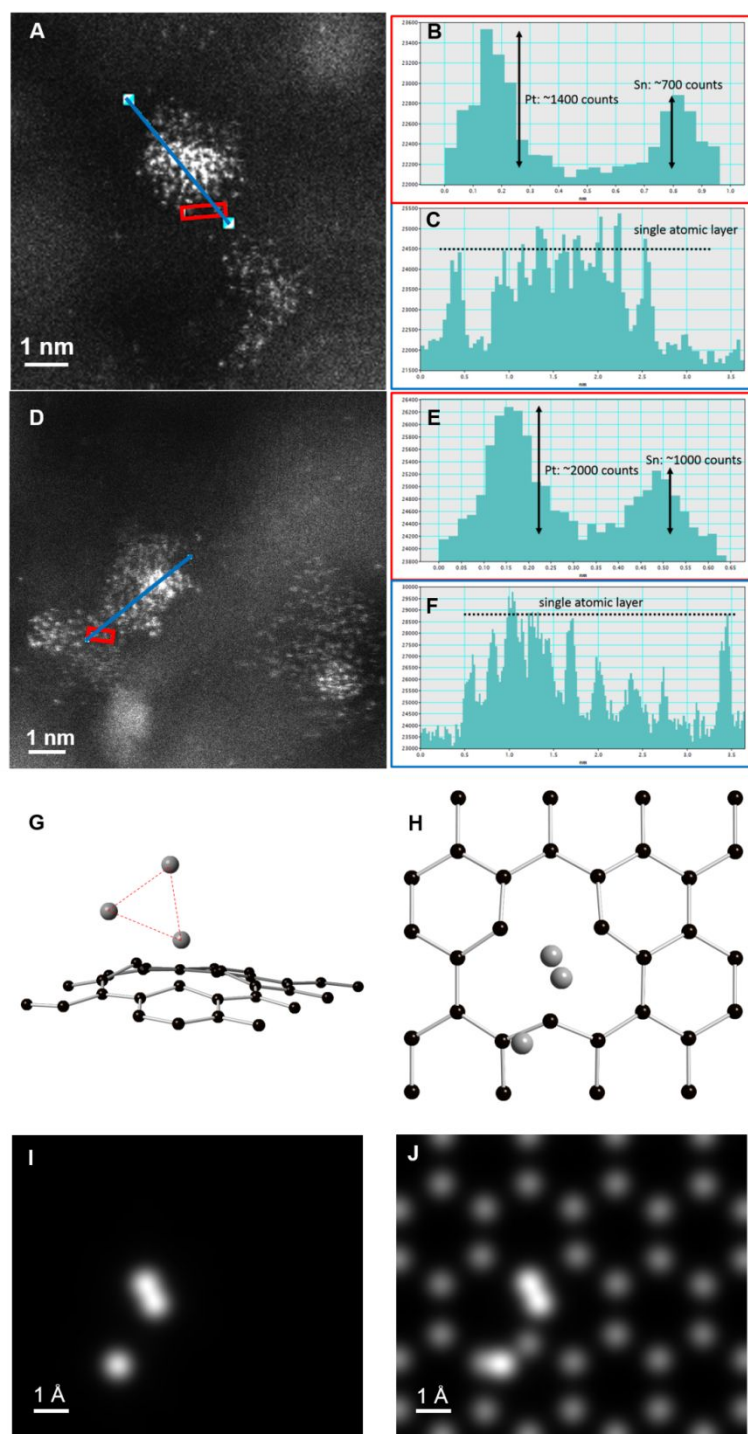

**fig. S4.** A) and D) HAADF-STEM image of a-PtSn/ND@G and the extracted line profiles B-C) and E-F) along red and blue directions in A) and D), respectively, demonstrating the pronounced intensity difference between Pt and Sn, as well as the single-atomic-layer thickness of a typical PtSn nanocluster, according to the Z-contrast imaging mechanism. G-J) HAADF-STEM image simulations. Atomic model G) showing a  $\text{Pt}_3$  on defective graphene surface and its projection view H) along the

electron beam direction. **I)** Simulated image of the structure in **H)** using experimental parameters, where carbon atoms is invisible due to the low contrast. **J)** Simulated image of the same structure as **I)** but carbon atoms were artificially replaced by Sn atoms to demonstrate the distinguishable “Z-contrast” of Pt and Sn atoms.

It is clear from these results that the irregularly-shaped Pt particles are composed of random aggregates of ultra-small Pt clusters, and the Pt species are one atomic-layer-thick. Clearly, the planes of Pt<sub>3</sub> triangle and carbon support surface are not parallel with each other, which may explain the irregular atomic structures of Pt clusters under STEM due to the projection nature of TEM imaging mechanisms.

**Table S1.** Physicochemical parameters of different samples.

| Sample                                            | $S_{\text{BET}}$<br>[m <sup>2</sup> g <sup>-1</sup> ] | Vt<br>[cm <sup>3</sup> g <sup>-1</sup> ] | Average<br>pore diameter<br>[nm] | Dispersion of Pt <sup>[a]</sup><br>[%] |      |
|---------------------------------------------------|-------------------------------------------------------|------------------------------------------|----------------------------------|----------------------------------------|------|
|                                                   |                                                       |                                          |                                  | fresh                                  | used |
| a-PtSn/ND@G                                       | 378                                                   | 1.62                                     | 16.4                             | 99.2                                   | 97.3 |
| Pt <sub>3</sub> Sn/Al <sub>2</sub> O <sub>3</sub> | 134                                                   | 0.83                                     | 23.0                             | 74.7                                   | 65.3 |
| Pt/ND@G                                           | 354                                                   | 1.59                                     | 17.2                             | 83.2                                   | 80.6 |

[a] Measured by H<sub>2</sub>-O<sub>2</sub> titration method.

N<sub>2</sub> adsorption was employed to characterize the specific surface area and pore volume of the as-prepared samples (a-PtSn/ND@G and Pt<sub>3</sub>Sn/Al<sub>2</sub>O<sub>3</sub>). Notably, the Al<sub>2</sub>O<sub>3</sub> support has larger average pore diameter, while the BET and cumulative volume of pores of ND@G are larger than that of Al<sub>2</sub>O<sub>3</sub> support.



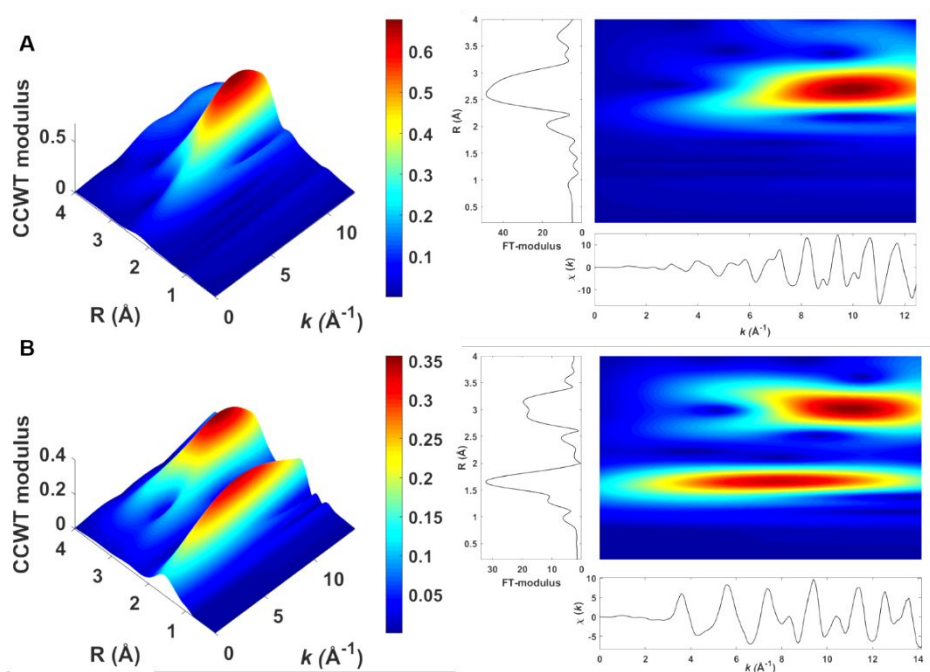

**fig. S5.** Wavelet transform (WT) analysis of **A)** Pt foil and **B)** PtO<sub>2</sub>



**Table S2.** Pt L<sub>3</sub>-edge and Sn K-edge EXAFS fitting results for a-PtSn/ND@G and Pt/ND@G.

| Sample                                                                                                                                                                                                                                                                                                                                                                                                                                                                                    | Shell                | C.N | R(Å) | $\Delta\sigma^2(*10^{-3} \text{ Å}^2)$ | $\Delta E_0$ shift (eV) |
|-------------------------------------------------------------------------------------------------------------------------------------------------------------------------------------------------------------------------------------------------------------------------------------------------------------------------------------------------------------------------------------------------------------------------------------------------------------------------------------------|----------------------|-----|------|----------------------------------------|-------------------------|
| a-PtSn/ND@G                                                                                                                                                                                                                                                                                                                                                                                                                                                                               | Pt-Pt                | 1.8 | 2.75 | 9.3                                    | 7.6                     |
|                                                                                                                                                                                                                                                                                                                                                                                                                                                                                           | Pt-Sn                | -   | -    | -                                      | -                       |
|                                                                                                                                                                                                                                                                                                                                                                                                                                                                                           | Pt-C/O               | 2.2 | 2.02 | 3.1                                    | 7.6                     |
|                                                                                                                                                                                                                                                                                                                                                                                                                                                                                           | Sn-O                 | 5.9 | 2.06 | 5.0                                    | 5.9                     |
|                                                                                                                                                                                                                                                                                                                                                                                                                                                                                           | Sn-Pt                | -   | -    | -                                      | -                       |
|                                                                                                                                                                                                                                                                                                                                                                                                                                                                                           | Sn-O-Sn <sub>1</sub> | 1.2 | 3.37 | 3.0                                    | 5.3                     |
|                                                                                                                                                                                                                                                                                                                                                                                                                                                                                           | Sn-O-Sn <sub>2</sub> | 4.8 | 3.89 | 3.0                                    | 5.3                     |
| Pt/ND@G                                                                                                                                                                                                                                                                                                                                                                                                                                                                                   | Pt-Pt                | 4.8 | 2.70 | 7.6                                    | 3.3                     |
|                                                                                                                                                                                                                                                                                                                                                                                                                                                                                           | Pt-C/O               | 2.1 | 2.03 | 2.1                                    | 3.3                     |
| EXAFS parameters characterizing a-PtSn/ND@G, Pt <sub>3</sub> Sn/Al <sub>2</sub> O <sub>3</sub> and Pt/ND@G. C.N., coordination number; R, distance between absorber and backscatter atoms; $\Delta\sigma^2$ , disorder term; $\Delta E_0$ , inner potential correction. Error bounds characterizing the structural parameters obtained by EXAFS spectroscopy are estimated to be C.N., $\pm 20\%$ ; R, $\pm 0.02 \text{ Å}$ ; $\Delta\sigma^2$ , $\pm 20\%$ ; $\Delta E_0$ , $\pm 20\%$ . |                      |     |      |                                        |                         |

For the a-PtSn/ND@G catalyst, the dominant scattering is Sn-O at a distance of 2.05 Å, with the average C.N. of 5.9. Meanwhile two Sn-O-Sn shells, with an average C.N. of 1.2 at a bond distance of 3.37 Å and 4.8 at a bond distance of 3.89 Å, are also resolved and denoted as Sn-O-Sn<sub>1</sub> and Sn-O-Sn<sub>2</sub>. These results suggest that the Sn species are highly dispersed on ND@G support as tin oxide species, in good agreement with the X-ray absorption near edge structure (XANES) data as displayed in Figure S7.

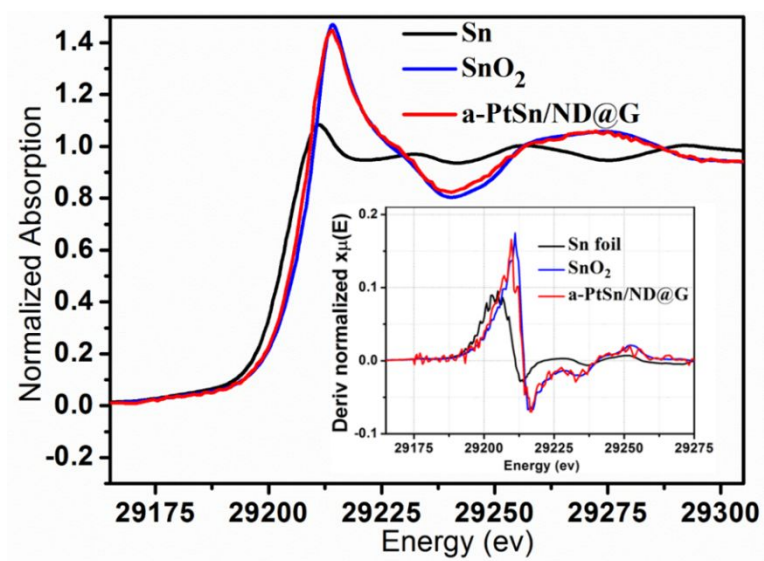

**fig. S6.** XANES data characterizing Sn foil, a-PtSn/ND@G, and SnO<sub>2</sub>.

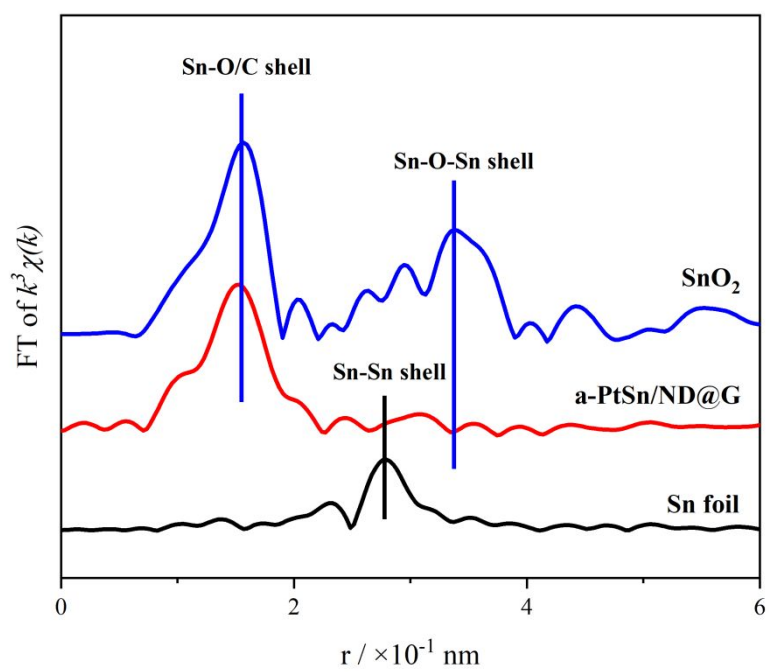

**fig. S7.** FT-EXAFS profiles of Sn K edge of a-PtSn/ND@G, Sn foil and SnO<sub>2</sub>.

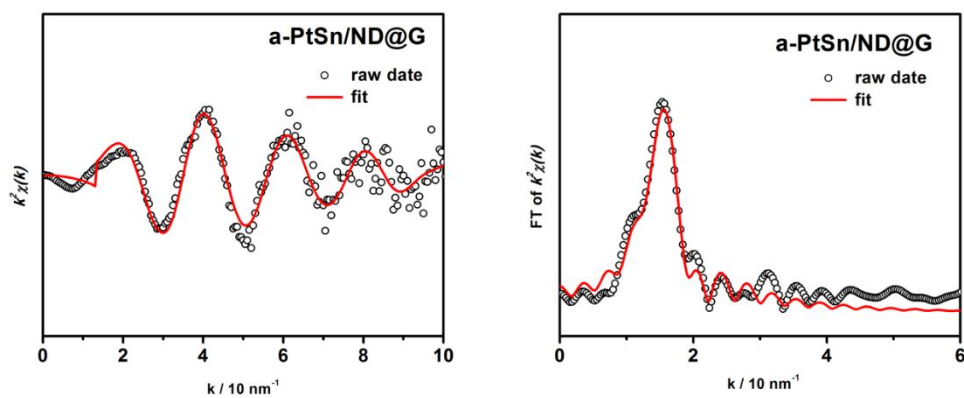

**fig. S8.** Sn K-edge EXAFS fitting results for a-PtSn/ND@G. Solid lines are fitting results, and dotted lines are EXAFS data.

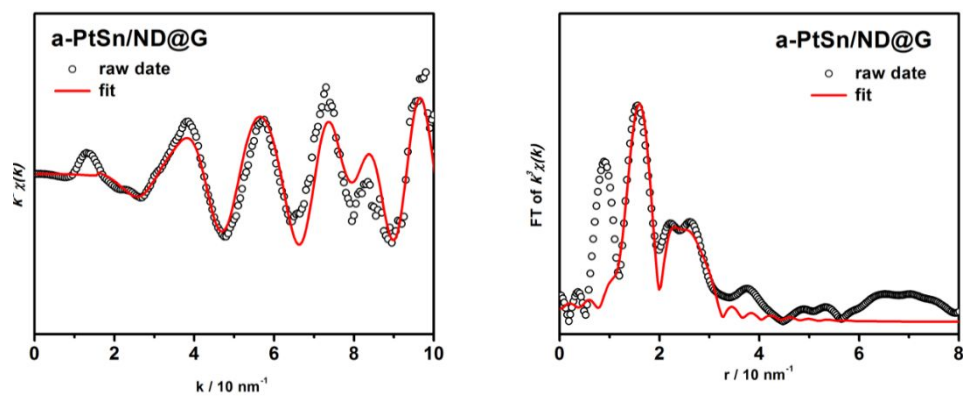

**fig. S9.** Pt  $L_3$ -edge EXAFS fitting results for a-PtSn/ND@G. Solid lines are fitting results, and dotted lines are EXAFS data.

**Table S3.** Activity performance of as-prepared catalysts for n-butane dehydrogenation reaction at 450 °C, GHSV=18000 mL/g<sub>cat</sub>·h.

| Catalyst                                          | Conv.<br>C <sub>i</sub> /C <sub>f</sub> (%) | Selectivity<br>S <sub>i</sub> /S <sub>f</sub> (%) |           |                   |         | Olefin<br>Yield<br>(Y <sub>f</sub> )<br>(%) | $k_d$ <sup>[a]</sup><br>[h <sup>-1</sup> ] | $\tau$ <sup>[b]</sup><br>[h] |
|---------------------------------------------------|---------------------------------------------|---------------------------------------------------|-----------|-------------------|---------|---------------------------------------------|--------------------------------------------|------------------------------|
|                                                   |                                             | 1-butene                                          | 2-butene  | 1,3-<br>butadiene | others  |                                             |                                            |                              |
| a-PtSn/ND@G                                       | 40.9/35.6                                   | 23.4/23.7                                         | 70.1/71.1 | 4.7/3.9           | 1.8/1.4 | 35.2                                        | 0.0124                                     | 80.6                         |
| Pt <sub>3</sub> Sn/Al <sub>2</sub> O <sub>3</sub> | 13.6/6.2                                    | 22.1/23.8                                         | 65.6/68.7 | 4.4/4.8           | 7.9/2.7 | 6.0                                         | 0.0495                                     | 20.2                         |
| Pt/ND@G                                           | 24.4/13.4                                   | 22.0/23.3                                         | 65.6/68.8 | 4.0/4.4           | 8.4/3.5 | 13.5                                        | 0.0510                                     | 24.1                         |

i: initial catalytic value after reaction 30min.

f: final catalytic value after reaction 18h.

[a]:  $k_d$ , deactivation rate constant, calculated from  $k_d = \{\ln[(1-C_f)/C_i] - \ln[(1-C_i)/C_i]\}/t$ .

[b]:  $\tau$  represents the catalyst life, which is the reciprocal of the deactivation rate constants ( $\tau = 1/k_d$ ), and means time required for rates to decrease by e<sup>-1</sup>.

The DDH stability was evaluated by a first-order deactivation as shown in **Table S4**. The a-PtSn/ND@G catalyst displays a lower deactivation rate (0.0124 h<sup>-1</sup>) and longer catalyst life time (80.6 h), illustrating its higher activity and stability in comparison with that of the typical Pt<sub>3</sub>Sn/Al<sub>2</sub>O<sub>3</sub> and Pt/ND@G catalyst.

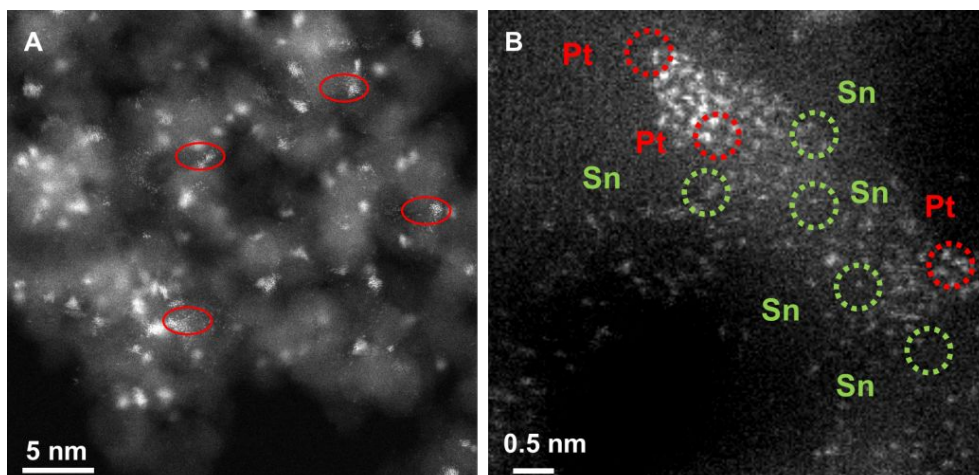

**fig. S10.** HAADF-STEM characterization of the used a-PtSn/ND@G catalyst showing the homogeneous dispersion of Pt clusters **A)** and atomic dispersion of Pt cluster and Sn species on ND@G marked out by red (Pt) and green (Sn) circles **B).**



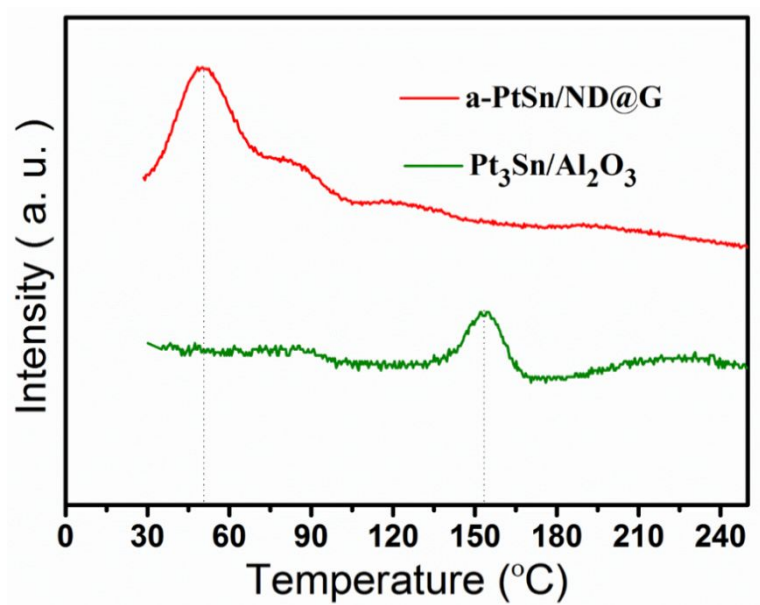

**fig. S11.** *n*-C<sub>4</sub>H<sub>8</sub>-TPD profiles of a-PtSn/ND@G and Pt<sub>3</sub>Sn/Al<sub>2</sub>O<sub>3</sub> catalysts.

**Table S4.** Summary of the reaction performance of various Pt-based catalysts for the direct dehydrogenation of n-Butane.

| Catalyst                                           | T<br>(°C) | GHSV<br>(mL/g <sub>cat</sub> ·h) | Feed                                                          | Conversion<br>(%)       | Selectivity<br>(%) | Ref.      |
|----------------------------------------------------|-----------|----------------------------------|---------------------------------------------------------------|-------------------------|--------------------|-----------|
| 0.3wt%Pt-Sn/MgAl <sub>2</sub> O <sub>3</sub>       | 530       | 5400                             | nC <sub>4</sub> /H <sub>2</sub> =1.25<br>N <sub>2</sub> =44.5 | 32-28 (10 min-2 h)      | 97.0               | 3         |
| 0.3wt%Pt-Sn/Y-Al <sub>2</sub> O <sub>3</sub>       | 530       | 5400                             | nC <sub>4</sub> /H <sub>2</sub> =1.25<br>He=44.5              | 30-28 (10 min-2 h)      | 94.4               | 4         |
| 0.89wt%Pt-In/Mg(Al)(In)O                           | 530       | 960000                           | nC <sub>4</sub> /H <sub>2</sub> =2.5<br>He=54.5               | 13-7.5 (10 min-2 h)     | 95.0               | 5         |
| Pt/Sn/Zn/ $\gamma$ -Al <sub>2</sub> O <sub>3</sub> | 550       | 600                              | nC <sub>4</sub> /N <sub>2</sub> =1:1                          | 76.0-59.1 (1 h-6 h)     | 84.8               | 6         |
| a-PtSn/ND@G                                        | 450       | 18000                            | nC <sub>4</sub> /H <sub>2</sub> /N <sub>2</sub> =1:1:48       | 40.9-35.7 (30 min-18 h) | 98.7               | This work |

**Table S5.** Energies (DFT calculation) of possible Pt<sub>3</sub>O<sub>1</sub>-graphene structures (Pt: blue; O: red; C: grey).

| Labels | Structures                                                                         | Energies(eV) | Labels | Structures                                                                         | Energies(eV) |
|--------|------------------------------------------------------------------------------------|--------------|--------|------------------------------------------------------------------------------------|--------------|
| a)     | 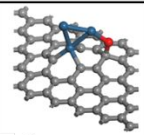  | -465.62      | f)     |  | -466.28      |
| b)     |   | -466.38      | g)     |  | -466.02      |
| c)     |   | -464.94      | h)     |  | -465.70      |
| d)     |   | -465.50      | i)     |  | -465.72      |
| e)     |  | -466.30      |        |                                                                                    |              |

**Table S6.** Energies (DFT calculations) of possible Pt<sub>3</sub>O<sub>2</sub>-graphene structures (Pt: blue; O: red; C: grey).

| Labels | Structures                                                                          | Energies(eV) | Labels | Structures                                                                           | Energies(eV) |
|--------|-------------------------------------------------------------------------------------|--------------|--------|--------------------------------------------------------------------------------------|--------------|
| (a)    | 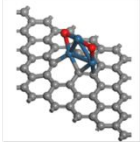   | -473.21      | (g)    |    | -472.31      |
| (b)    |    | -473.0       | (h)    |    | -471.42      |
| (c)    |    | -473.01      | (i)    |    | -471.99      |
| (d)    |   | -472.00      | (j)    |   | -471.67      |
| (e)    |  | -472.05      | (k)    |  | -473.19      |
| (f)    |  | -472.41      | (l)    |  | -472.20      |

**Table S7.** Energies (DFT calculations) of possible Pt<sub>3</sub>O<sub>3</sub>-graphene structures (Pt: blue; O: red; C: grey).

| Labels | Structures                                                                         | Energies(eV) | Labels | Structures                                                                          | Energies(eV) |
|--------|------------------------------------------------------------------------------------|--------------|--------|-------------------------------------------------------------------------------------|--------------|
| a)     | 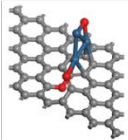  | -479.03      | e)     |   | -478.72      |
| b)     |   | -479.19      | f)     |   | -478.07      |
| c)     |   | -479.45      | g)     |   | -479.77      |
| d)     |  | -478.04      | h)     |  | 477.35       |

We calculated the change of Gibbs free energies from the most stable Pt<sub>3</sub>O<sub>x</sub>-graphene to Pt<sub>3</sub>-graphene under reaction condition (T = 450 °C, P (H<sub>2</sub>) = 0.02Bar.):

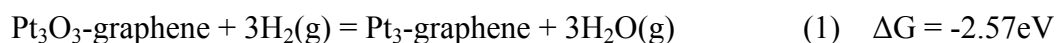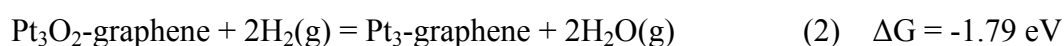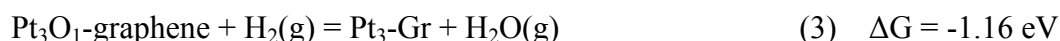

$\Delta G$  of the reaction (1) - (3) are -2.57, -1.79 and -1.16 eV, indicating that Pt<sub>3</sub>O<sub>3</sub>-graphene, Pt<sub>3</sub>O<sub>2</sub>-graphene and Pt<sub>3</sub>O<sub>1</sub>-graphene will be reduced to Pt<sub>3</sub>-graphene under the reaction condition (diluted H<sub>2</sub> at 450 °C). Therefore, Pt<sub>3</sub>-Gr model is chosen to present the working catalyst to investigate reaction activities and product selectivity.

The Gibbs free energy of H<sub>2</sub> and H<sub>2</sub>O gas species (T = 450 °C, P (H<sub>2</sub>) = 0.02 P<sup>°</sup>, P (H<sub>2</sub>O) = P<sup>°</sup>), is calculated by:

$$G(g, T/K, P) = E_{\text{DFT}} + E_{\text{ZPE}} + nRT - TS + RT\ln(P/P^0) \quad (4)$$

The Gibbs free energy of Pt<sub>3</sub>O<sub>3</sub>-graphene, Pt<sub>3</sub>O<sub>2</sub>-graphene and Pt<sub>3</sub>O<sub>1</sub>-graphene, including the O species zero-point energy, is calculated by:

$$G(\text{Adsorbed species}, T/K, P) = E_{\text{DFT}} + E_{\text{ZPE}} \quad (5)$$

The Gibbs free energy of Pt<sub>3</sub>-graphene is calculated by:

$$G(T/K, P) = E_{\text{DFT}} \quad (6)$$

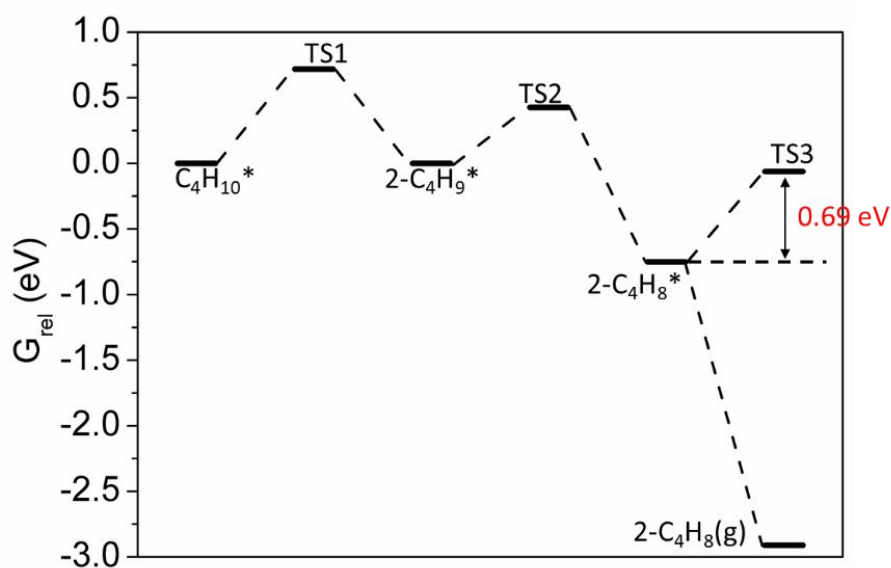

**fig. S12.** Relative Gibbs free energy profile ( $T = 450\text{ }^{\circ}\text{C}$ ) of butane dehydrogenation on the Pt<sub>3</sub>Sn-(111) surface.

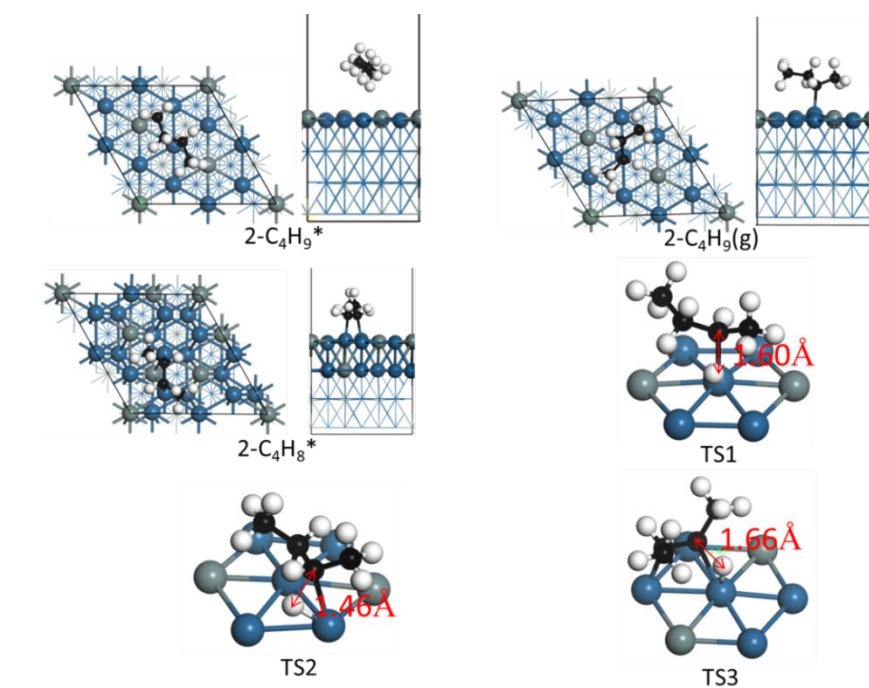

**fig. S13.** The structures for intermediates and transition states from  $\text{C}_4\text{H}_{10}$  to  $2\text{-C}_4\text{H}_8$  on  $\text{Pt}_3\text{Sn}$ -(111). Black: C, White: H, Blue: Pt, Gray: Sn.



**Table S8.** Step by step barrier ( $\Delta G_a$ , eV) and enthalpy energy change ( $\Delta H_r$ , eV) for n-butane dehydrogenation to 2-butene on Pt<sub>3</sub>-graphene and Pt<sub>3</sub>Sn-(111) surface.

| Reactions                                  | Pt <sub>3</sub> -graphene |                   | Pt <sub>3</sub> Sn-(111) |                   |
|--------------------------------------------|---------------------------|-------------------|--------------------------|-------------------|
|                                            | $\Delta H_r$ (eV)         | $\Delta G_a$ (eV) | $\Delta H_r$ (eV)        | $\Delta G_a$ (eV) |
| $C_4H_{10}(g) \rightarrow C_4H_{10}^*$     | -0.27                     | 2.87              | -0.11                    | 3.09              |
| $C_4H_{10}^* \rightarrow 2-C_4H_9^* + H^*$ | -0.53                     | 0.11              | 0.00                     | 0.72              |
| $2-C_4H_9^* \rightarrow 2-C_4H_8^* + H^*$  | -0.63                     | 0.01              | -0.75                    | 0.43              |
| $2-C_4H_8^* \rightarrow 2-C_4H_7^* + H^*$  | --                        | 1.34              | --                       | 0.69              |
| $2-C_4H_8^* \rightarrow 2-C_4H_8(g)$       | 1.22                      | --                | 0.66                     | --                |

**Table S9.** The energy change of Pt3@Gr structure with the increased k-points mesh.

| k-points<br>mesh | E, eV   |
|------------------|---------|
| 1 × 1 × 1        | -460.12 |
| 2 × 2 × 1        | -460.75 |
| 3 × 3 × 1        | -460.69 |
| 4 × 4 × 1        | -460.69 |
| 5 × 5 × 1        | -460.69 |

**Table S10.** The reaction energies and activation energies of butane to 2-butene on Pt3@Gr using PBE, HSE06 functional, respectively.

|                                                                           | PBE(3 × 3 × 1) | HSE06(3 × 3 × 1) |
|---------------------------------------------------------------------------|----------------|------------------|
| R1: C <sub>4</sub> H <sub>10</sub> (g)→C <sub>4</sub> H <sub>10</sub> *   |                |                  |
| ΔE                                                                        | -0.27          | -0.26            |
| R2: C <sub>4</sub> H <sub>10</sub> *→2-C <sub>4</sub> H <sub>9</sub> *    |                |                  |
| ΔE                                                                        | -0.53          | -0.59            |
| Ea                                                                        | 0.11           | 0.14             |
| R3: 2-C <sub>4</sub> H <sub>9</sub> *→2-C <sub>4</sub> H <sub>8</sub> *   |                |                  |
| ΔE                                                                        | -0.63          | -0.71            |
| Ea                                                                        | 0.01           | 0.02             |
| R4: 2-C <sub>4</sub> H <sub>8</sub> *→2-C <sub>4</sub> H <sub>8</sub> (g) |                |                  |
| ΔE                                                                        | 1.22           | 1.36             |
| R5: 2-C <sub>4</sub> H <sub>8</sub> *→2-C <sub>4</sub> H <sub>7</sub> *   |                |                  |
| Ea                                                                        | 1.34           | 1.46             |

a. Brackets indicate k-points mesh.

## Supporting References

- (1) M. Ozawa, M. Inaguma, M. Takahashi, F. Kataoka, A. Krüger, E. Ōsawa, Preparation and Behavior of Brownish, Clear Nanodiamond Colloids. *Adv. Mater.* **19**, 1201-1206 (2007).
- (2) J. Liu, Y. Yue, H. Liu, Z. Da, C. Liu, A. Ma, J. Rong, D. Su, X. Bao, H. Zheng, Origin of the Robust Catalytic Performance of Nanodiamond–Graphene-Supported Pt Nanoparticles Used in the Propane Dehydrogenation Reaction *ACS Catal.* **7**, 3349-3355 (2017).
- (3) S. Bocanegra, O. Scelza, S. de Miguel, Effect of the Synthesis Method of  $\text{MgAl}_2\text{O}_4$  and of Sn and Pb Addition to Platinum Catalysts on the Behavior in n-Butane Dehydrogenation. *Ind. Eng. Chem. Res.* **49**, 4044-4054 (2010).
- (4) A. D. Ballarini, P. Zgolicz, I. M. J. Vilella, S. R. de Miguel, A. A. Castro, O. A. Scelza, A. n-Butane dehydrogenation on Pt, PtSn and PtGe supported on  $\gamma\text{-Al}_2\text{O}_3$  deposited on spheres of  $\alpha\text{-Al}_2\text{O}_3$  by washcoating. *Appl. Catal. A-Gen.* **381**, 83-91 (2010).
- (5) J. Wu, Z. Peng, P. Sun, A. T. Bell, n-Butane dehydrogenation over Pt/Mg(In)(Al)O. *Appl. Catal. A-Gen.* **470**, 208-214 (2014).
- (6) H. Seo, J. K. Lee, U. G. Hong, G. Park, Y. Yoo, J. Lee, H. Chang, I. K. Song, Direct dehydrogenation of n-butane over Pt/Sn/M/ $\gamma\text{-Al}_2\text{O}_3$  catalysts: Effect of third metal (M) addition. *Catal. Commun.* **47**, 22-27 (2014).
